# Supplementary material for: Endophytic Trichoderma citrinoviride isolated from mountain-cultivated ginseng (Panax ginseng) has great potential as a biocontrol agent against ginseng pathogens
Source: PubMed Central journal article supplement — J Ginseng Res. 2018 Apr 4;43(3):408–20. doi: 10.1016/j.jgr.2018.03.002 (PMC6606899; doi:10.1016/j.jgr.2018.03.002), 2018-04-04
Supplement: mmc1.pdf [file mmc1.pdf]

**Table S1** Primer sequences for QPCR

| <b>Genes</b>                                            | <b>Forward seq. (5'-&gt;3')</b> | <b>Reverse seq. (3'-&gt;5')</b> |
|---------------------------------------------------------|---------------------------------|---------------------------------|
| <b><i>Panax ginseng</i> ginsenoside synthetic genes</b> |                                 |                                 |
| <i>PgACT</i> (Actin)                                    | GGATCCACGAGACTACTTACAACCTC      | AACACTATATTTTCTCTCGGGAGGT       |
| <i>PgFPS</i> (Farnesyl diphosphate synthase )           | GCGAAGATCTGGAGAAACATACTAA       | GGATCATCCTTTCCATAGTTCTCAT       |
| <i>PgSS</i> (Squalene synthase)                         | AAGTCTTCAGAGGGGTAGTGAAAAT       | GACTCGCTCTCGATTATGTATGATT       |
| <i>PgSE</i> (Squalene epoxidase)                        | TCCAATTAGCCTATTTCTCCACTTC       | GAGCTCTGTAGTAAGCAGGAACAAT       |
| <i>PgBAS</i> (Beta-amyrin synthase)                     | ATATGTACCATTAGAAGGAAACCGC       | ATATATTCCGGTAAGCTGCATAGTG       |
| <i>PgDS</i> (Dammareniol-II synthase)                   | GGACTTATGACAACAGTGAAGCAGT       | GATCAACAACCTTTGCTGCTCTATG       |
| <i>PPDS</i> (Cytochrome P450 <i>CYP716A47</i> )         | TGGAACATTCAGAGAAGCTATTACC       | TACTAGACGTGCATACTCAATTCCC       |
| <i>PPTS</i> (Cytochrome P450 <i>CYP716A53v2</i> )       | GACCTATGCCATTCACATTTATACC       | AGCGTACAAGGTGATAGACGAATAG       |
| <b><i>Panax ginseng</i> defense-related genes</b>       |                                 |                                 |
| <i>PgPR2</i> (Beta-1,3-glucanase)                       | CCTGAAGGTAATCGTGGATAACAATA      | ACAGATAAGTCTCTATTGGCCTTCC       |
| <i>PgPR3</i> (Chitinase)                                | TCACTCATAACTACAACCTATGGGCA      | TTATGTTAGTGATGACACCGTAAGC       |
| <i>PgPR4</i> (Pathogenesis-related protein 4)           | ATGGACAGCCTTCTGTGGTC            | CTTGAGCATTACCCCTTCCA            |
| <i>PgPR5</i> (Thaumatin-like protein)                   | TTCTCTAGTGGATGGGTTTAATGTG       | CTAGGGAAACTATAAGCGTTGGG         |
| <i>PgPR6</i> (Cysteine proteinase inhibitor)            | TGAGGTTATTGAGGAATCTGCTAAG       | GGTTAACACAACACTGAACATACCA       |
| <i>PgPR10</i> (Ribonuclease)                            | AGCATGCATTCACTTACACTTACAC       | GAATAGTTGGATTGACTTATCGGTG       |
| <b><i>Botrytis cinerea</i> growth-related genes</b>     |                                 |                                 |
| <i>BcACT</i> (Actin)                                    | GATGTCCGTAAGGATTTGTATGGTA       | GATCCACATCTGTTGGAAAGTAGAC       |
| <i>BcBCG1</i> (G-protein $\alpha$ -subunit)             | GTATCACCGAAACAACCTTCATC         | AAAGTGTGAGTGCTTCTTGCATAC        |
| <i>BcBOT1</i> (Cytochrome P450 monooxygenase)           | CTTTACGAGTACAAGACTGTCCGAT       | GGAAGATATTAGGGTCAGTGTGAAC       |
| <i>BcBAC</i> (Adenylate cyclase)                        | GTCTAAGGTTAGAGATGCTGTGCTC       | GAGATAGCTATTTGACCGAGTGC         |
| <i>BcPKA1</i> (Protein kinase)                          | CAGAAGTGGTCTCGAGTAAAGGTTA       | AGAACCACCATGTAAGTTACCAAGA       |
| <i>BcCHS1</i> (Chitin synthase class I)                 | CTAGAACAATGCACGGAGTATTCA        | ATATTCATAGATGTGTGCTGTCACG       |
| <i>BcCHSIII</i> (Chitin synthase class III)             | CCTTGTTCTATCCATGTATCTGGTC       | GTTGATGTAAGATGACATGAGCAAC       |
| <i>BcTRE1</i> (Trehalose-6-phosphate synthase)          | ATACGGAAGAAGTTCAGATGCTAT        | CCTCTACTAAGTCTGGCATCTTGTC       |
| <b><i>Trichoderma citrinoviride</i></b>                 |                                 |                                 |
| <i>TcACT</i> (Actin)                                    | GCTCCAGCTTGGAGAAGTCCTAC         | AATTAGCGCCACTATTCAGAACTC        |
| <i>TcTEF</i> (Translation elongation factor)            | GAGACTGGTGTCTCAAGCC             | GACCTGAGCGGTGAAAGAAG            |
| <i>TcEDG</i> (Endoglucanase)                            | CTATCATCGTACGTGTCTCGACTAA       | TCCTTTGTTGTCTCGTAGATAGTTG       |
| <b><i>Cylindrocarpon destructans</i></b>                |                                 |                                 |
| <i>CdIGS</i> (Intergenic spacer)                        | GCTACCCTATAGCGCAGGTG            | CCGTAAGGCTGAAGAGTCA             |
