# Supplementary material for: Endophytic Trichoderma citrinoviride isolated from mountain-cultivated ginseng (Panax ginseng) has great potential as a biocontrol agent against ginseng pathogens
Source: PubMed Central journal article supplement — J Ginseng Res. 2018 Apr 4;43(3):408–20. doi: 10.1016/j.jgr.2018.03.002 (PMC6606899; doi:10.1016/j.jgr.2018.03.002), 2018-04-04
Supplement: mmc2.pdf [file mmc2.pdf]

**Table S2** Formulation of *T. citrinoviride* for granule and dustable powder type

| <b>Materials for granule (GR)</b>          | <b>Concentration (%)</b> |
|--------------------------------------------|--------------------------|
| <i>T. citrinoviride</i> (mix with nitrate) | 4.3                      |
| White carbon                               | 2                        |
| Polyvinyl alcohol (PVA)                    | 0.1                      |
| Corn starch                                | 1.2                      |
| Bentonite                                  | 20                       |
| Calcite                                    | 72.4                     |

  

| <b>Materials for dustable powder (DP)</b>  | <b>Concentration (%)</b> |
|--------------------------------------------|--------------------------|
| <i>T. citrinoviride</i> (mix with nitrate) | 4.3                      |
| White carbon                               | 2.9                      |
| Dortmite                                   | 92.8                     |
